# Supplementary material for: CoII, NiII, CuII and ZnII complexes of a bipyridine bis-phenol conjugate: Generation and properties of coordinated radical species
Source: Royal Society of Chemistry journal article supplement (doi:10.1039/c0dt00342e), 2010-01-01
Supplement: c0dt00342e.pdf [file c0dt00342e.pdf]

## Electronic Supporting Information

# **Co<sup>II</sup>, Ni<sup>II</sup>, Cu<sup>II</sup>, and Zn<sup>II</sup> complexes of a bipyridine bis-phenol conjugates: Generation and Properties of Coordinated Radical Species**

Himanshu Arora, Christian Philouze, Olivier Jarjayes\*, and Fabrice Thomas\*

Dalton Trans.

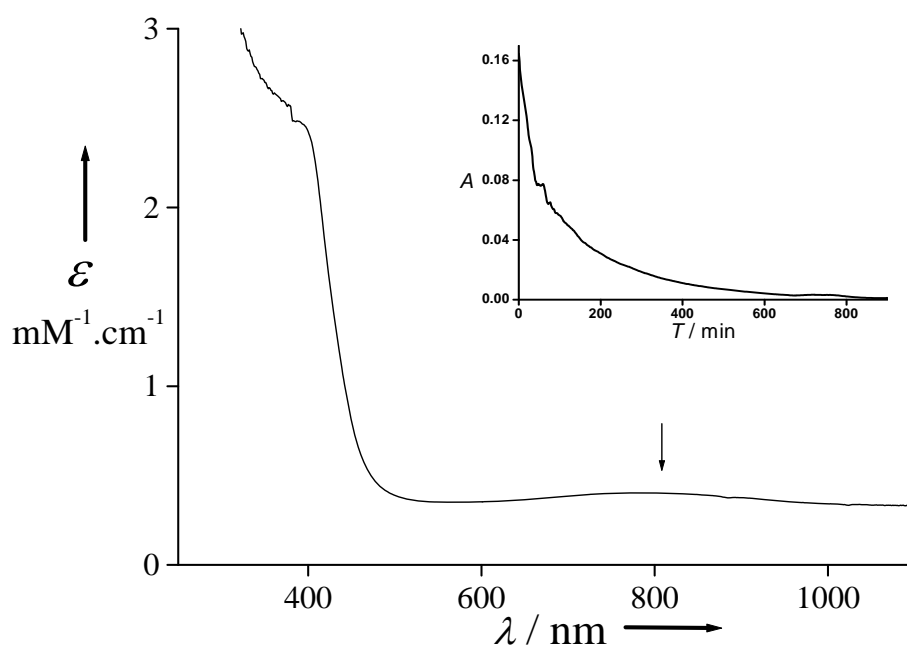

**Figure S1** Electronic spectra of the electrogenerated  $[\text{Zn}^{\text{II}}(\text{L}^{\bullet})]^{2+}$  in  $\text{CH}_2\text{Cl}_2$  (0.01 M TBAP). The insert represents the decay pattern at  $T = 298$  K.  $l = 1.000$  cm.

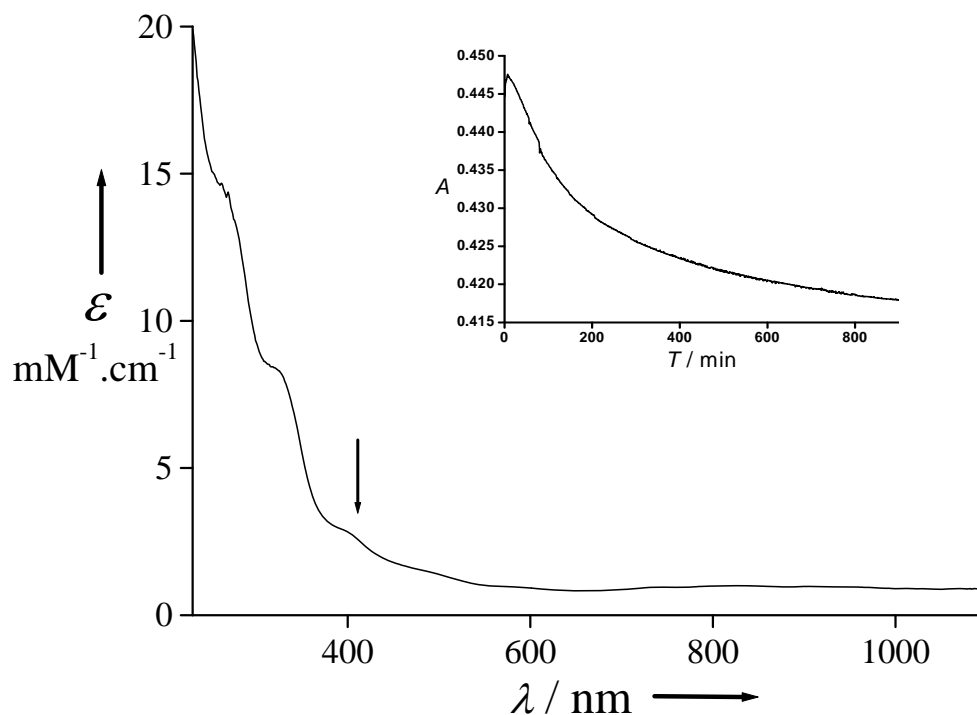

**Figure S2** Electronic spectra of the electrogenerated  $[\text{Co}^{\text{III}}(\text{L}^{\bullet})]^+$  in  $\text{CH}_2\text{Cl}_2$  (0.01 M TBAP); The insert represents the decay pattern at  $T = 298 \text{ K}$ .  $l = 1.000 \text{ cm}$ .

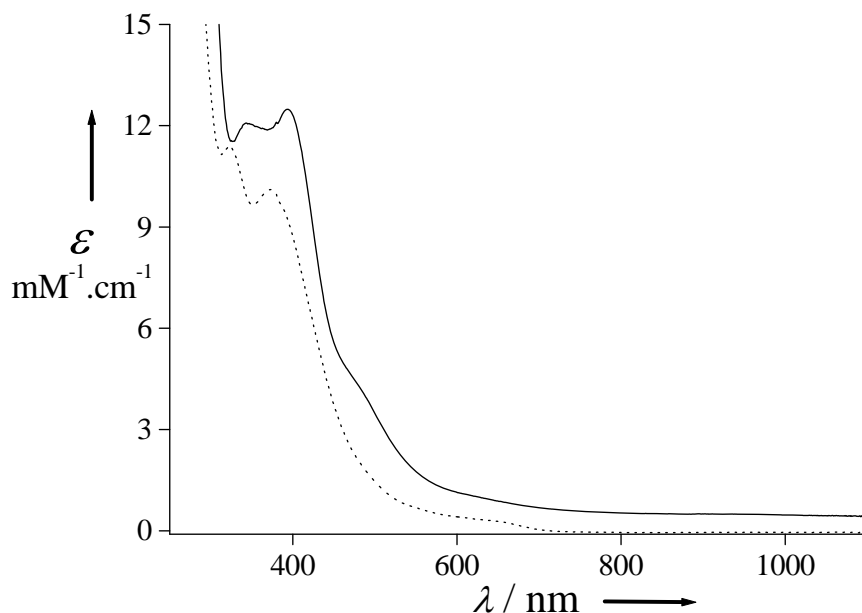

**Figure S3** Electronic spectra of 0.05 mM solutions of  $[\text{Co}^{\text{II}}(\text{L})(\text{Py})(\text{O}_2^{\bullet})]$  (dotted line) and the electrogenerated  $[\text{Co}^{\text{III}}(\text{L}^{\bullet})(\text{Py})_x]^{2+}$  (solid line) in  $\text{CH}_2\text{Cl}_2$  containing 0.005 M TBAP, room temperature, path length = 1.000 cm; where  $x = 1$  or 2.

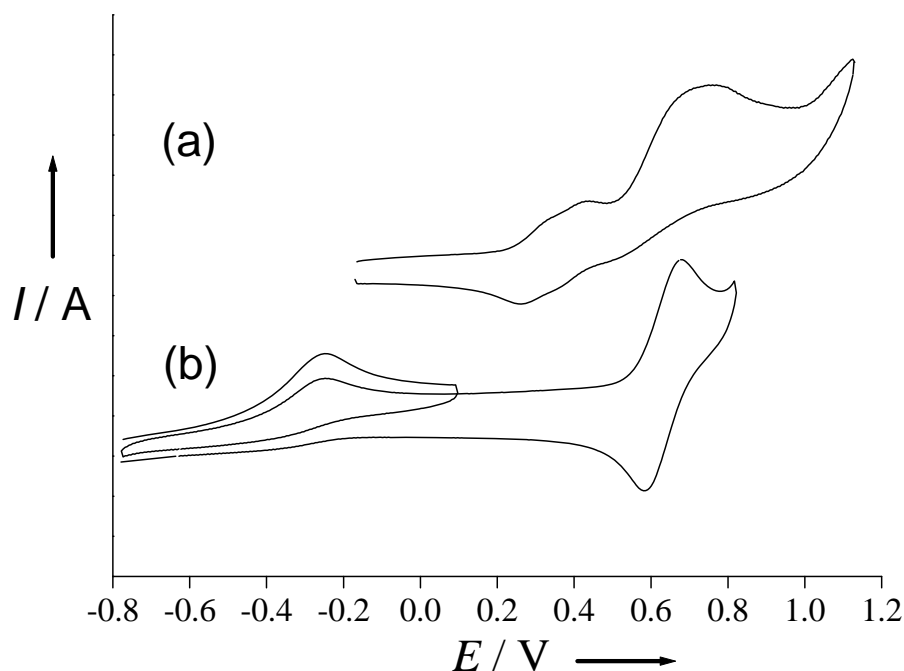

**Figure S4** CV curves of  $\text{CH}_2\text{Cl}_2$  solutions (+ 0.1 M TBAP) of the complexes (a)  $[\text{Ni}^{\text{II}}\text{L}]$ , (b)  $[\text{Co}^{\text{II}}\text{L}]$  in the presence of 0.05 M pyridine. Concentrations are 0.75 mM, and the potentials are referenced vs.  $\text{Fc}^+/\text{Fc}$ . Scan rate:  $0.1 \text{ V}\cdot\text{s}^{-1}$ ,  $T = 298 \text{ K}$

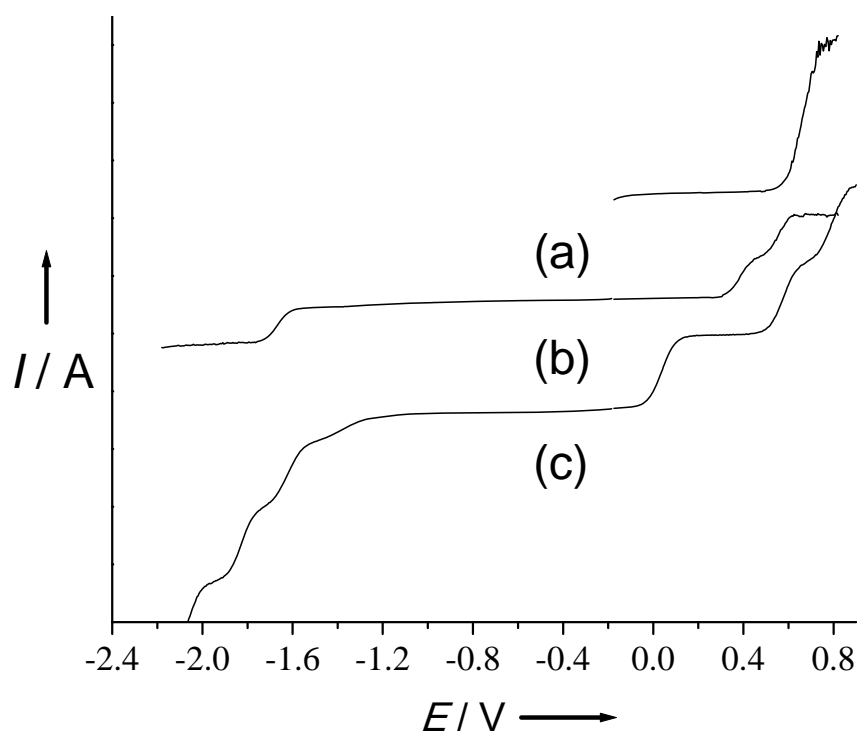

**Figure S5** RDE curves of  $\text{CH}_2\text{Cl}_2$  solutions (+ 0.1 M TBAP) of the complexes (a)  $[\text{Zn}^{\text{II}}\text{L}]$ , (b)  $[\text{Cu}^{\text{II}}\text{L}]$ , (c)  $[\text{Co}^{\text{II}}\text{L}]$ .  $T = 298 \text{ K}$ . Concentrations are 0.75 mM except for  $[\text{Cu}^{\text{II}}\text{L}]$  (0.5 mM), and the potentials are referenced vs.  $\text{Fc}^+/\text{Fc}$ . Scan rate:  $0.01 \text{ V}\cdot\text{s}^{-1}$  (500 rpm),  $T = 298 \text{ K}$ .

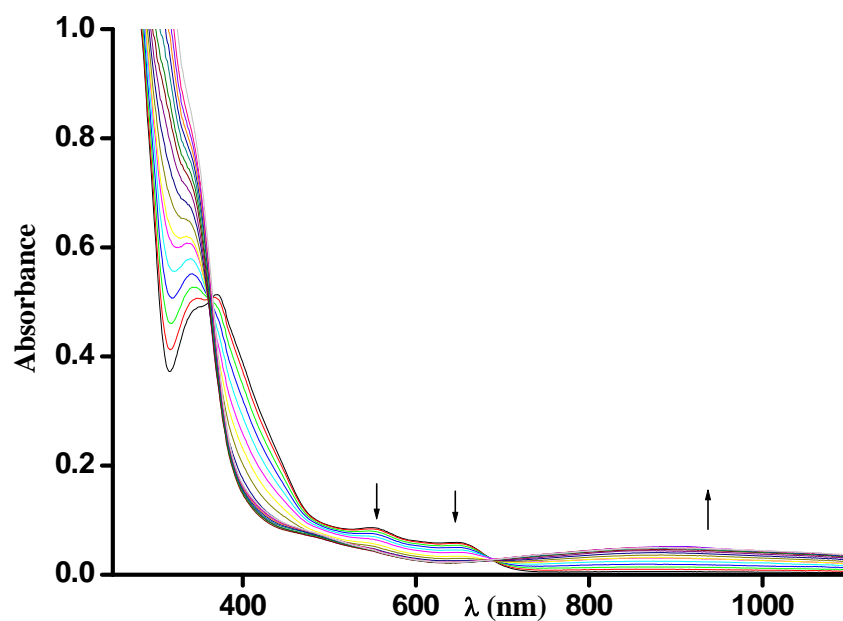

**Figure S6** Spectrochemical titration of  $[\text{Co}^{\text{II}}(\text{L})]$  with 0-2 equivalents of Tris(4-bromophenyl) ammonium hexachloro antimonate. Arrows indicate spectral changes upon addition of oxidizer.  $T = 298 \text{ K}$ ,  $l = 1.000 \text{ cm}$ ,  $[\text{Co}^{\text{II}}\text{L}] = 0.05 \text{ mM}$ .

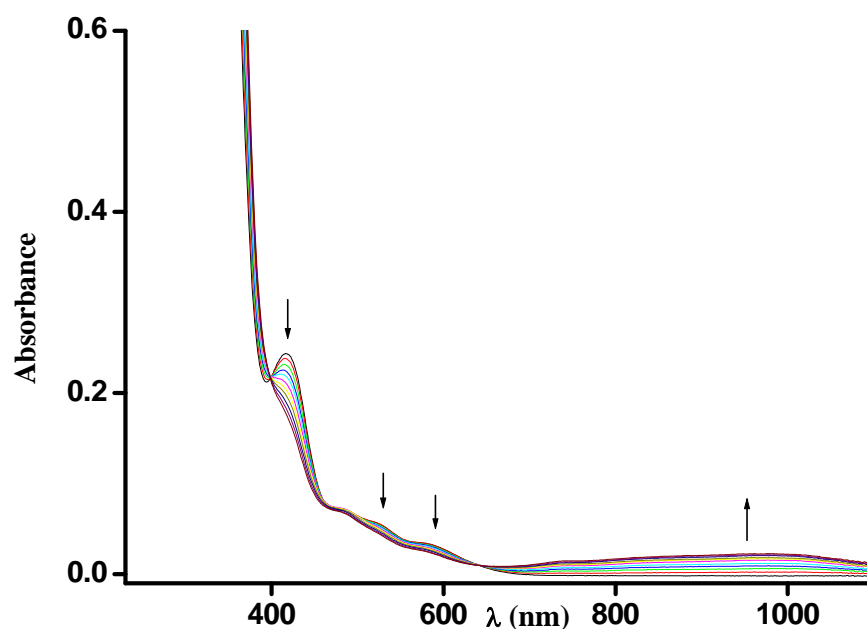

**Figure S7** Spectrochemical titration of  $[\text{Ni}^{\text{II}}\text{L}]$  with 0-1 equivalent of Tris(4-bromophenyl) ammonium hexachloro antimonate. Arrows indicate spectral changes upon addition of oxidizer.  $T = 298 \text{ K}$ ,  $l = 1.000 \text{ cm}$ ,  $[\text{Ni}^{\text{II}}\text{L}] = 0.02 \text{ mM}$ .

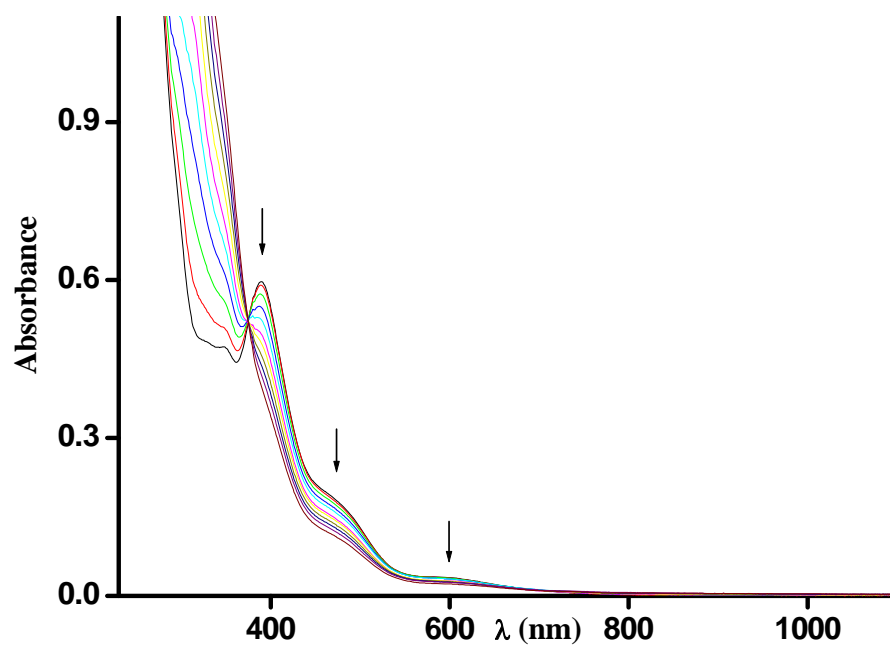

**Figure S8** Spectrochemical titration of  $[\text{Cu}^{\text{II}}\text{L}]$  in  $\text{CH}_2\text{Cl}_2$  with 0-1 equivalent of Tris(4-bromophenyl) ammonium hexachloro antimonate. Arrows indicate spectral changes upon addition of oxidizer.  $T = 298 \text{ K}$ ,  $l = 1.000 \text{ cm}$ ,  $[\text{Cu}^{\text{II}}\text{L}] = 0.05 \text{ mM}$ .
